# Supplementary material for: Evaluating the Safety and Efficacy of Crenezumab vs Placebo in Adults With Early Alzheimer Disease: Two Phase 3 Randomized Placebo-Controlled Trials
Source: PubMed Central journal article supplement — JAMA Neurol. 2022 Sep 19;79(11):1113–21. doi: 10.1001/jamaneurol.2022.2909 (PMC9486635; doi:10.1001/jamaneurol.2022.2909), 2022-09-19
Supplement: jamaneurol-e222909-s003.pdf [file jamaneurol-e222909-s003.pdf]

## Data Sharing Statement

### Data

**Data available:** Yes

**Data types:** Deidentified participant data

**How to access data:** <https://vivli.org/ourmembers/roche/>

**When available:** With publication

### Supporting Documents

**Document types:** None

### Additional Information

**Who can access the data:** Qualified researchers requesting data, whose proposed use of the data has been approved

**Types of analyses:** For any purpose

**Mechanisms of data availability:** After approval of a proposal

**Any additional restrictions:** Anonymized records for individual patients across more than one data source external to Roche cannot, and should not, be linked due to a potential increase in risk of patient re-identification. For up to date details on Roche's Global Policy on the Sharing of Clinical Information and how to request access to related clinical study documents, see here: [https://go.roche.com/data\\_sharing](https://go.roche.com/data_sharing).
